# Supplementary material for: cis-[(η5-C5H5)Fe(η1-CO)(μ-CO)]2, the poor relative between cis and trans tautomers. A theoretical study of the gas-phase Fe L3-edge and C and O K-edge XAS of trans-/cis-[(η5-C5H5)Fe(η1-CO)(μ-CO)]2
Source: Royal Society of Chemistry journal article supplement (doi:10.1039/d1cp04105c), 2021-01-01
Supplement: d1cp04105c1.pdf [file d1cp04105c1.pdf]

## Supplementary Information

# *cis*-[( $\eta^5$ -C<sub>5</sub>H<sub>5</sub>)Fe( $\eta^1$ -CO)( $\mu$ -CO)]<sub>2</sub>, the poor relative between *cis* and *trans* tautomers. A theoretical study of the Fe L<sub>3</sub>-edge and C and O K-edge XAS of *trans*-/*cis*-[( $\eta^5$ -C<sub>5</sub>H<sub>5</sub>)Fe( $\eta^1$ -CO)( $\mu$ -CO)]<sub>2</sub>.

Silvia Carlotto,<sup>a,b,\*</sup> Girolamo Casella,<sup>c</sup> Mauro Sambì,<sup>a,d</sup> Maurizio Casarin<sup>a,b,\*</sup>

<sup>a</sup>Dipartimento di Scienze Chimiche, Università degli Studi di Padova, Via Francesco Marzolo 1, 35131 Padova - Italy

<sup>b</sup>Institute of Condensed Matter Chemistry and Technologies for Energy (ICMATE), National Research Council (CNR), c/o Department of Chemistry, University of Padova, via Francesco Marzolo 1, 35131 Padova - Italy

<sup>c</sup>Dipartimento di Scienze della Terra e del Mare, Università degli Studi di Palermo, Via Archirafi, 22, 90123 Palermo – Italy

<sup>d</sup>Consorzio INSTM, Unità di Ricerca di Padova, Via Francesco Marzolo 1, 35131 Padova - Italy

**Figure S1.** Licorice representation of the *cis*-I (left) and *trans*-I (right) structures optimized in ref. 13 superimposed to the SR ZORA BLYP D3(BJ) ones, obtained by assuming a C<sub>1</sub> symmetry point group. Structure are all optimized in *vacuum* by adopting TZ2P [13] and TZ2P ZORA basis sets for all the atoms in NR and SR calculations, respectively.

p. S2

**Figure S2a.** 3D Plot of the *trans*-I t<sub>2g</sub>-like (left panel) and e<sub>g</sub> (right panel) MOs. Displayed iso-surfaces correspond to  $\pm 0.05 e^{1/2} \times \text{\AA}^{-3/2}$  values.

p. S3

**Figure S2b.** 3D Plot of the *cis*-I t<sub>2g</sub>-like (left panel) and e<sub>g</sub> (right panel) MOs. Displayed iso-surfaces correspond to  $\pm 0.05 e^{1/2} \times \text{\AA}^{-3/2}$  values.

p. S4

**Figure S3.** 3D Plot of the *trans*-I 15b<sub>g</sub> and 16b<sub>g</sub> VMOs. Displayed iso-surfaces correspond to  $\pm 0.05 e^{1/2} \times \text{\AA}^{-3/2}$  values

p. S5

**Table S1.** SR ZORA BLYP D3(BJ) C<sub>1</sub> thermodynamic quantities associated to the *trans*-I ↔ *cis*-I equilibrium at different T.

p. S6

**Table S2.** Optimized SR ZORA BLYP D3(BJ) C<sub>1</sub> Cartesian coordinated (Å) of *cis*-I

p. S7

**Table S3.** Optimized SR ZORA BLYP D3(BJ) C<sub>1</sub> Cartesian coordinated (Å) of *trans*-I

p. S8

**Table S4.** SO ZORA RTD-DFT compositions and *EE* values of transitions of symmetry a<sub>1</sub>, b<sub>1</sub> and b<sub>2</sub> associated to electronic states generating the *cis*-I (C<sub>2v</sub>) Fe L<sub>3</sub>-edge.

p. S9

**Table S5.** Energy order of C and O 1s-based SALCs ( $\sigma$ SALCs) of *cis*-I.

p. S10

**Table S6.** SR ZORA RTD-DFT compositions and *EE* values of transitions of symmetry a<sub>1</sub>, b<sub>1</sub> and b<sub>2</sub> associated to electronic states generating the *cis*-I (C<sub>2v</sub>) C K-edge.

p. S11

**Table S7.** SR ZORA TD-DFT % compositions and *EE* values of transitions of symmetry a<sub>1</sub>, b<sub>1</sub> and b<sub>2</sub> associated to electronic states generating the *cis*-I (C<sub>2v</sub>) O K-edge.

p. S12

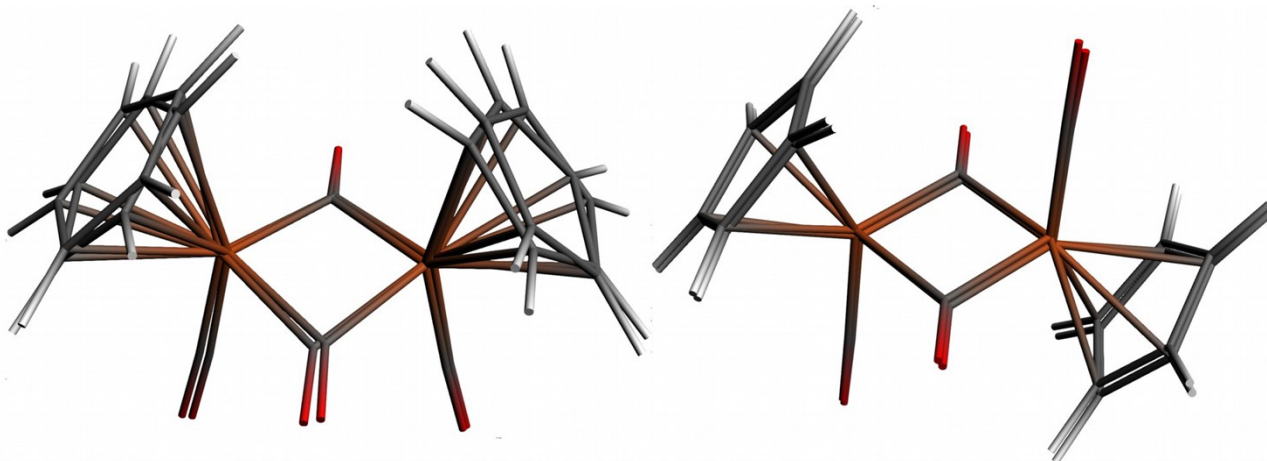

**Figure S1.** Licorice representation of the *cis-I* (left) and *trans-I* (right) structures optimized in ref. 13 superimposed to the SR ZORA BLYP D3(BJ) ones, obtained by assuming a  $C_1$  symmetry point group. Structures are all optimized in *vacuum* by adopting TZ2P<sup>13</sup> and TZ2P ZORA basis sets for all the atoms in NR and SR calculations, respectively.

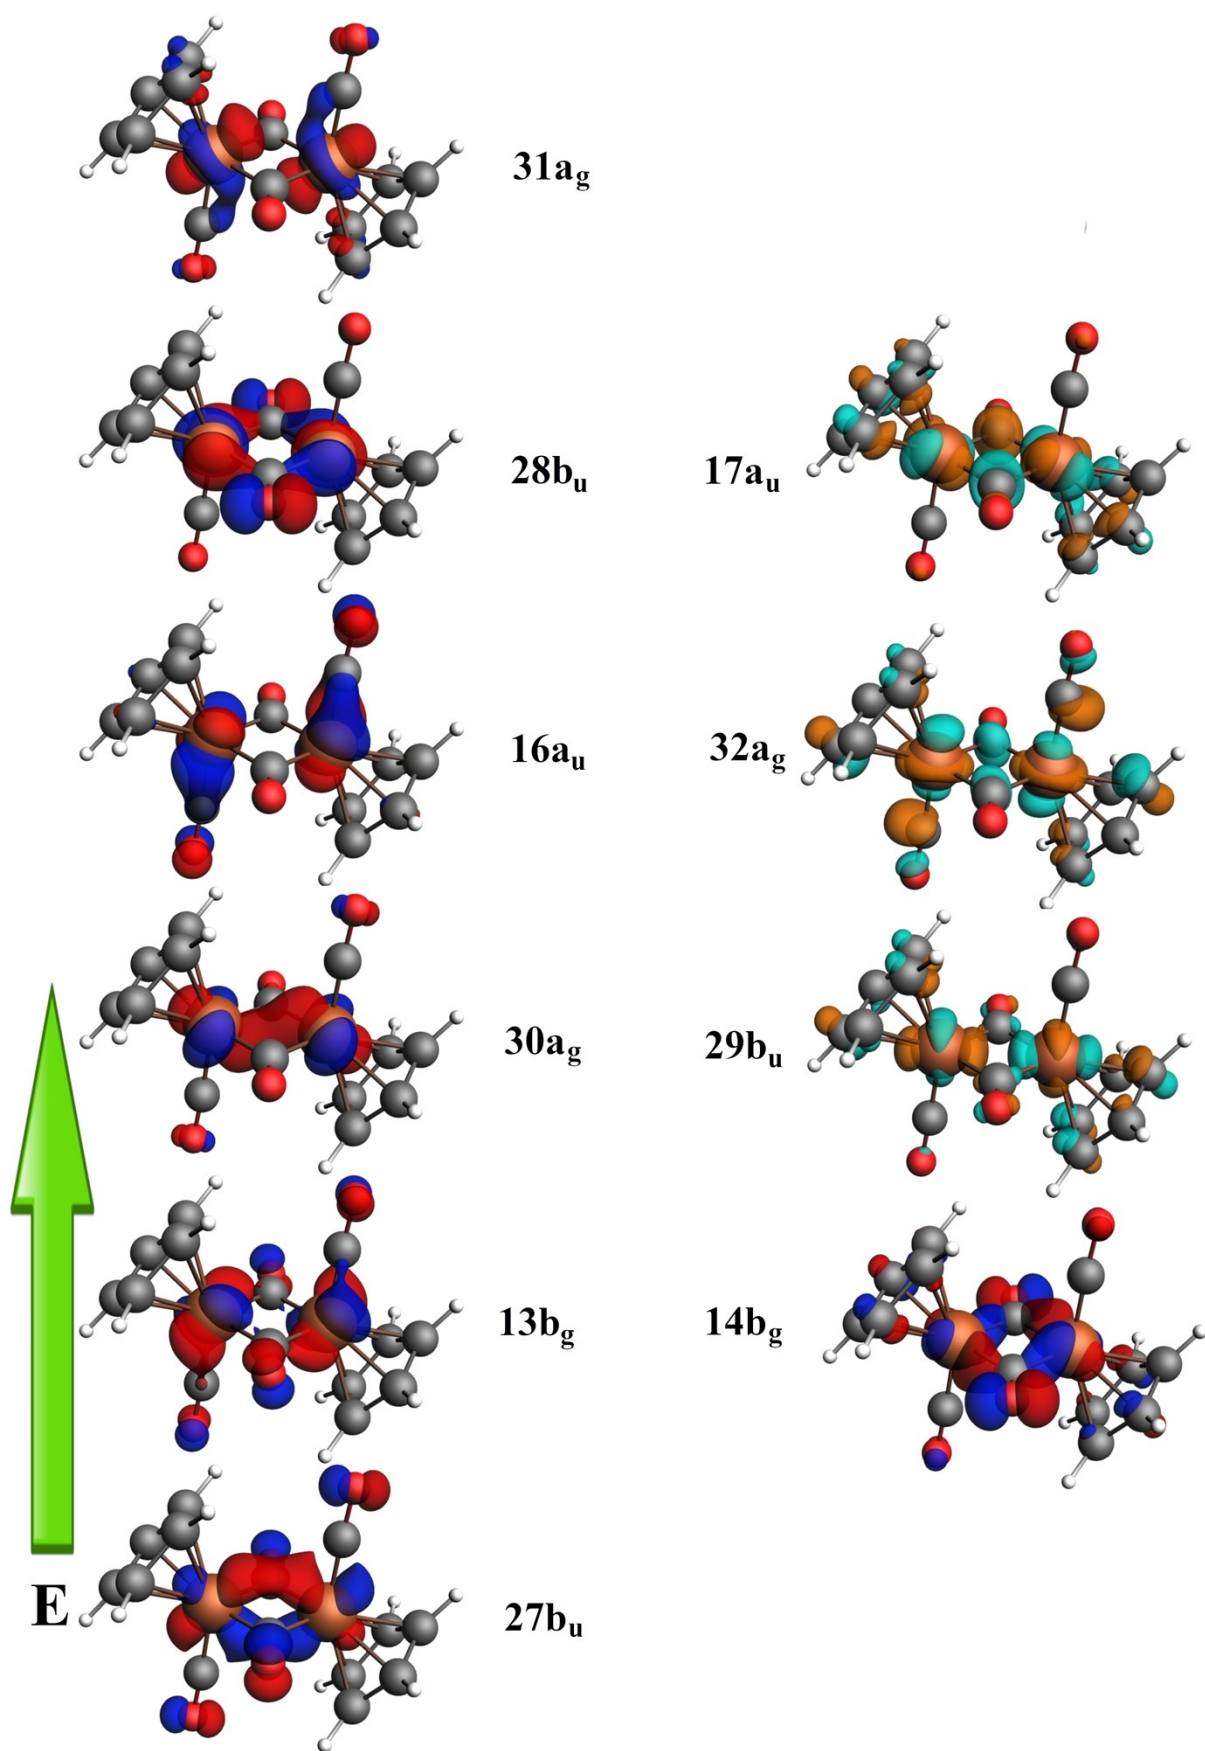

**Figure S2a.** 3D Plot of the *trans-I*  $t_{2g}$ -like (left panel) and  $e_g$  (right panel) MOs. Displayed iso-surfaces correspond to  $\pm 0.05 e^{1/2} \times \text{\AA}^{-3/2}$  values; the 14b<sub>g</sub> and 29b<sub>u</sub> orbitals are the HOMO and LUMO, respectively.

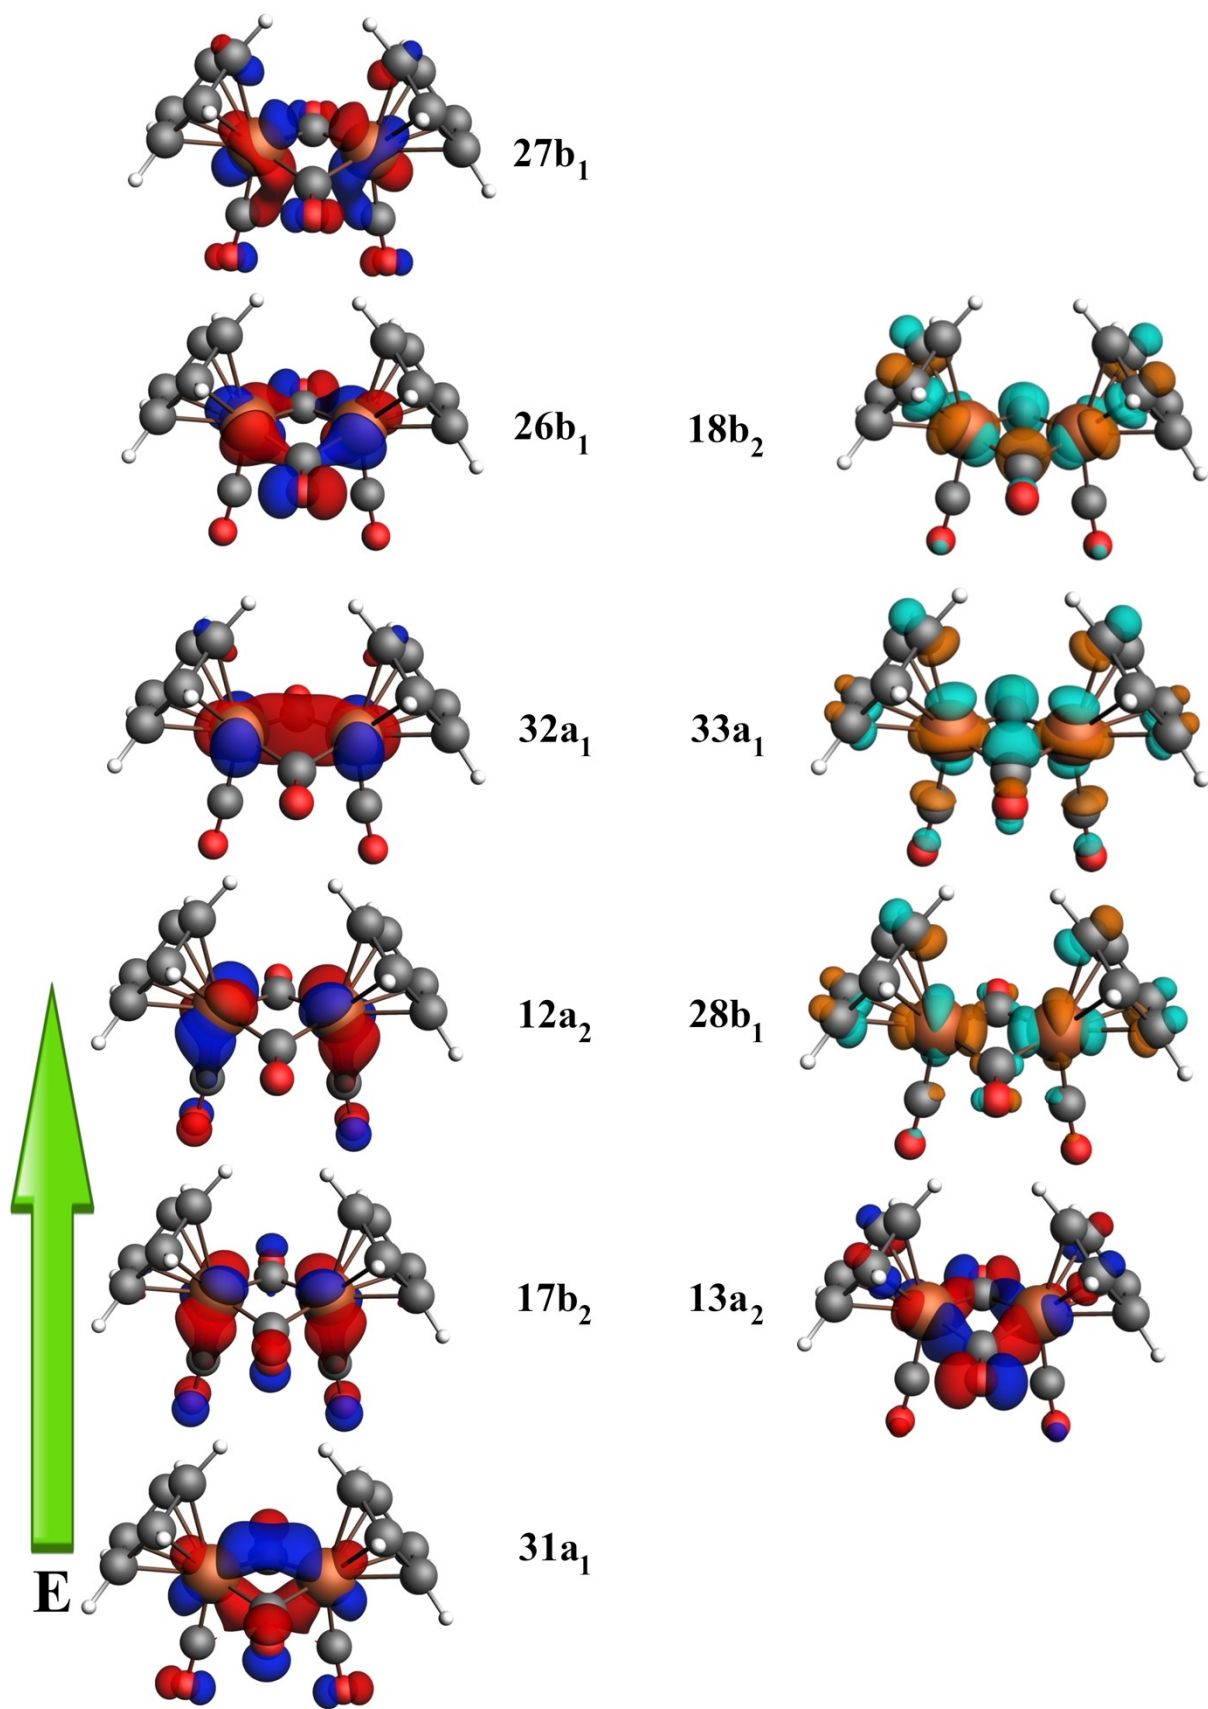

**Figure S2b.** 3D Plot of the *cis-I* t<sub>2g</sub>-like (left panel) and e<sub>g</sub> (right panel) MOs. Displayed iso-surfaces correspond to  $\pm 0.05 e^{1/2} \times \text{\AA}^{-3/2}$  values; the 13a<sub>2</sub> and 28b<sub>1</sub> orbitals are the HOMO and LUMO, respectively.

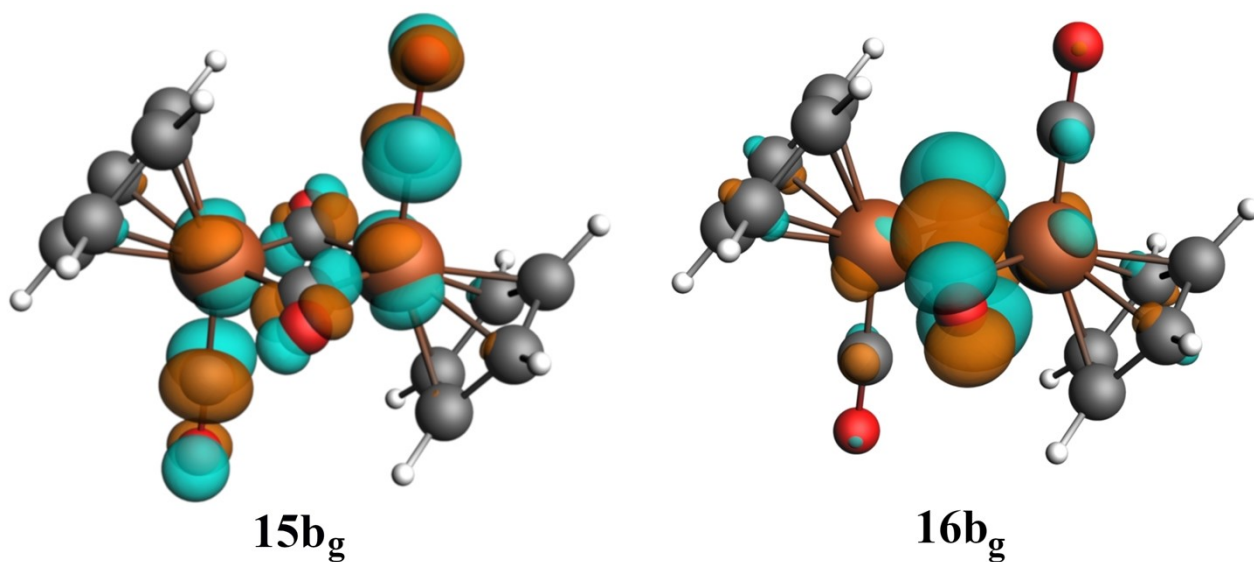

**Figure S3.** 3D Plot of the *trans-I* 15b<sub>g</sub> and 16b<sub>g</sub> VMOs. Displayed iso-surfaces correspond to  $\pm 0.05 \text{ e}^{1/2} \times \text{\AA}^{-3/2}$  values.

**Table S1.** SR ZORA BLYP D3(BJ) C<sub>1</sub> thermodynamic quantities associated to the *trans-I* ⇌ *cis-I* equilibrium at different T.\*

|                                | <i>cis-I</i> <sup>298.15</sup> | <i>trans-I</i> <sup>298.15</sup> | <i>cis-I</i> <sup>368</sup> | <i>trans-I</i> <sup>368</sup> | <i>cis-I</i> <sup>383</sup> | <i>trans-I</i> <sup>383</sup> |
|--------------------------------|--------------------------------|----------------------------------|-----------------------------|-------------------------------|-----------------------------|-------------------------------|
| Electronic Energy              | -4522.25                       | -45232.61                        | -4522.25                    | -45232.61                     | -4522.25                    | -45232.61                     |
| Dispersion Energy              | -63.11                         | -63.32                           | -63.11                      | -63.32                        | -63.11                      | -63.32                        |
| Total Bonding Energy (BE)      | -4585.36                       | -4586.93                         | -4585.36                    | -4586.93                      | -4585.36                    | -4586.93                      |
| NIE <sup>†</sup>               | 137.21                         | 137.24                           | 142.82                      | 142.84                        | 141.86                      | 141.87                        |
| H = (BE + NIE) **              | -4448.15                       | -4449.69                         | -4442.54                    | -4444.09                      | -4443.50                    | -4445.06                      |
| S                              | 143.61                         | 144.56                           | 160.91                      | 161.81                        | 164.50                      | 165.39                        |
| TS                             | 42.82                          | 43.10                            | 59.22                       | 59.55                         | 63.00                       | 63.34                         |
| G = H – TS                     | -4490.97                       | -4492.79                         | -4501.76                    | -4503.64                      | -4506.50                    | -4508.40                      |
| ΔG (cis-trans)                 | 1.82                           |                                  | 1.88                        |                               | 1.90                        |                               |
| K <sub>eq</sub> =[cis]/[trans] | 0.046                          |                                  | 0.077                       |                               | 0.083                       |                               |

\*BE, NIE, TS, H, G, ΔG in kcal × mol<sup>-1</sup>; S in cal × mol<sup>-1</sup> × K<sup>-1</sup>; †NIE stands for Nuclear Internal Energy. \*\*The RT contribution term has been neglected for each isomer, being the molar work term contribution calculated as: Δn × RT, with Δn = 0.

**Table S2.** Optimized SR ZORA BLYP D3(BJ) C<sub>1</sub> Cartesian coordinated of *cis-I*

|    |           |           |           |
|----|-----------|-----------|-----------|
| Fe | 1.270588  | -0.043514 | -0.020240 |
| Fe | -1.272275 | 0.044402  | -0.020215 |
| C  | 0.039168  | 1.438859  | -0.197717 |
| O  | 0.091529  | 2.621935  | -0.278322 |
| O  | -0.098598 | -2.615255 | -0.328546 |
| C  | -0.042044 | -1.434123 | -0.225123 |
| C  | -1.596984 | 0.053788  | -1.746460 |
| O  | -1.870567 | 0.063271  | -2.875587 |
| C  | 1.600311  | -0.021003 | -1.745568 |
| O  | 1.878735  | -0.009665 | -2.873472 |
| C  | -2.556737 | 1.289897  | 1.217686  |
| C  | -1.735776 | 0.486859  | 2.065815  |
| C  | -2.027835 | -0.890990 | 1.802587  |
| C  | -3.011117 | -0.948671 | 0.779769  |
| C  | -3.328738 | 0.407910  | 0.408427  |
| H  | -2.548642 | 2.369676  | 1.155731  |
| H  | -1.015854 | 0.859971  | 2.781206  |
| H  | -1.554019 | -1.743915 | 2.269796  |
| H  | -3.426100 | -1.844837 | 0.338611  |
| H  | -4.039853 | 0.704314  | -0.351934 |
| C  | 3.297878  | -0.537118 | 0.423567  |
| C  | 3.077737  | 0.860319  | 0.717594  |
| C  | 2.104543  | 0.932720  | 1.747789  |
| C  | 1.714413  | -0.402998 | 2.087410  |
| C  | 2.470622  | -1.310613 | 1.283415  |
| H  | 0.978137  | -0.681544 | 2.828465  |
| H  | 1.696849  | 1.842758  | 2.166972  |
| H  | 2.384403  | -2.388723 | 1.283046  |
| H  | 3.980592  | -0.926235 | -0.320860 |
| H  | 3.555805  | 1.697479  | 0.226696  |

**Table S3.** Optimized SR ZORA BLYP D3(BJ) C<sub>1</sub> Cartesian coordinated of *trans*-I

|    |           |           |           |
|----|-----------|-----------|-----------|
| Fe | 0.828030  | -0.965962 | -0.000274 |
| Fe | -0.827961 | 0.965927  | -0.000331 |
| C  | 0.000182  | 0.000016  | -1.446735 |
| O  | 0.000264  | 0.000118  | -2.633325 |
| C  | -0.000120 | -0.000046 | 1.445927  |
| O  | -0.000141 | -0.000096 | 2.632531  |
| C  | 2.249474  | 0.052222  | -0.001356 |
| O  | 3.207587  | 0.715647  | -0.001817 |
| C  | -2.249500 | -0.052143 | -0.001889 |
| O  | -3.207747 | -0.715357 | -0.002743 |
| C  | -1.996403 | 2.748042  | 0.001630  |
| C  | 0.193576  | 2.773357  | 0.715906  |
| C  | 0.193122  | 2.774581  | -0.714014 |
| C  | -1.159397 | 2.765718  | 1.164014  |
| C  | -1.160055 | 2.767773  | -1.161329 |
| H  | -3.078726 | 2.729116  | 0.001941  |
| H  | 1.071270  | 2.754405  | -1.345565 |
| H  | 1.072047  | 2.752060  | 1.346959  |
| H  | -1.493387 | 2.738959  | -2.189887 |
| H  | -1.492036 | 2.734757  | 2.192722  |
| C  | 1.996359  | -2.748207 | 0.000752  |
| C  | -0.193062 | -2.773243 | 0.716796  |
| C  | -0.193757 | -2.774588 | -0.713154 |
| C  | 1.160235  | -2.765847 | 1.163836  |
| C  | 1.159095  | -2.767855 | -1.161495 |
| H  | 3.078684  | -2.729347 | 0.000233  |
| H  | 1.493683  | -2.735131 | 2.192288  |
| H  | 1.491603  | -2.738984 | -2.190331 |
| H  | -1.072319 | -2.754372 | -1.344110 |
| H  | -1.071046 | -2.751824 | 1.348498  |



**Table S4.** SO ZORA RTD-DFT compositions (superscript in parentheses),  $f \times 10^3$  and  $EE$  values (eV) of transitions of symmetry  $a_1$ ,  $b_1$  and  $b_2$ , associated to states generating the Fe  $L_3$ -edge in *cis*-I ( $C_{2v}$ ).<sup>a,b,c</sup>

| Peak    | Energy (eV) | Sym.  | $f \times 10^3$ | Transitions <sup>d,e,f,g,h</sup>                                                                                                                                                                          |
|---------|-------------|-------|-----------------|-----------------------------------------------------------------------------------------------------------------------------------------------------------------------------------------------------------|
| $L_3^1$ | 703.2       | $a_1$ | 5.6             | $8e_{1/2} \rightarrow 90e_{1/2}^{(57)} + 7e_{1/2} \rightarrow 90e_{1/2}^{(20)}$                                                                                                                           |
| $L_3^1$ | 703.3       | $b_1$ | 7.1             | $8e_{1/2} \rightarrow 90e_{1/2}^{(43)} + 7e_{1/2} \rightarrow 90e_{1/2}^{(26)}$                                                                                                                           |
| $L_3^1$ | 703.9       | $b_1$ | 12.4            | $8e_{1/2} \rightarrow 91e_{1/2}^{(46)} + 10e_{1/2} \rightarrow 92e_{1/2}^{(17)} + 7e_{1/2} \rightarrow 91e_{1/2}^{(14)}$                                                                                  |
| $L_3^2$ | 704.1       | $a_1$ | 10.3            | $9e_{1/2} \rightarrow 92e_{1/2}^{(27)} + 7e_{1/2} \rightarrow 91e_{1/2}^{(23)} + 10e_{1/2} \rightarrow 94e_{1/2}^{(12)}$                                                                                  |
| $L_3^2$ | 704.1       | $b_1$ | 10.2            | $10e_{1/2} \rightarrow 92e_{1/2}^{(27)} + 8e_{1/2} \rightarrow 91e_{1/2}^{(23)} + 9e_{1/2} \rightarrow 94e_{1/2}^{(12)}$                                                                                  |
| $L_3^2$ | 704.1       | $b_2$ | 11.5            | $7e_{1/2} \rightarrow 92e_{1/2}^{(47)} + 8e_{1/2} \rightarrow 92e_{1/2}^{(37)}$                                                                                                                           |
| $L_3^2$ | 704.6       | $b_1$ | 10.9            | $10e_{1/2} \rightarrow 95e_{1/2}^{(44)} + 8e_{1/2} \rightarrow 93e_{1/2}^{(26)}$                                                                                                                          |
| $L_3^2$ | 704.7       | $b_1$ | 5.6             | $7e_{1/2} \rightarrow 95e_{1/2}^{(22)} + 9e_{1/2} \rightarrow 94e_{1/2}^{(14)}$                                                                                                                           |
| $L_3^2$ | 704.7       | $a_1$ | 9.2             | $8e_{1/2} \rightarrow 95e_{1/2}^{(22)} + 10e_{1/2} \rightarrow 94e_{1/2}^{(14)}$                                                                                                                          |
| $L_3^2$ | 704.7       | $a_1$ | 5.1             | $8e_{1/2} \rightarrow 95e_{1/2}^{(46)} + 7e_{1/2} \rightarrow 95e_{1/2}^{(17)} + 9e_{1/2} \rightarrow 96e_{1/2}^{(12)}$                                                                                   |
| $L_3^2$ | 704.9       | $a_1$ | 10.7            | $10e_{1/2} \rightarrow 97e_{1/2}^{(37)} + 7e_{1/2} \rightarrow 96e_{1/2}^{(16)} + 9e_{1/2} \rightarrow 96e_{1/2}^{(15)}$                                                                                  |
| $L_3^2$ | 704.9       | $b_2$ | 13.1            | $7e_{1/2} \rightarrow 95e_{1/2}^{(25)} + 10e_{1/2} \rightarrow 96e_{1/2}^{(17)} + 8e_{1/2} \rightarrow 94e_{1/2}^{(16)} + 10e_{1/2} \rightarrow 98e_{1/2}^{(14)} + 8e_{1/2} \rightarrow 95e_{1/2}^{(11)}$ |
| $L_3^2$ | 705.2       | $a_1$ | 19.8            | $8e_{1/2} \rightarrow 97e_{1/2}^{(42)} + 7e_{1/2} \rightarrow 96e_{1/2}^{(10)}$                                                                                                                           |
| $L_3^2$ | 705.2       | $a_1$ | 10.8            | $7e_{1/2} \rightarrow 97e_{1/2}^{(27)} + 8e_{1/2} \rightarrow 98e_{1/2}^{(18)} + 7e_{1/2} \rightarrow 98e_{1/2}^{(14)} + 7e_{1/2} \rightarrow 96e_{1/2}^{(11)}$                                           |
| $L_3^2$ | 705.2       | $b_1$ | 11.2            | $7e_{1/2} \rightarrow 97e_{1/2}^{(42)} + 8e_{1/2} \rightarrow 96e_{1/2}^{(10)}$                                                                                                                           |
| $L_3^2$ | 705.3       | $b_1$ | 9.0             | $8e_{1/2} \rightarrow 98e_{1/2}^{(40)} + 7e_{1/2} \rightarrow 98e_{1/2}^{(21)} + 8e_{1/2} \rightarrow 97e_{1/2}^{(12)}$                                                                                   |
| $L_3^3$ | 705.9       | $b_1$ | 7.8             | $9e_{1/2} \rightarrow 102e_{1/2}^{(29)} + 7e_{1/2} \rightarrow 100e_{1/2}^{(12)} + 9e_{1/2} \rightarrow 103e_{1/2}^{(12)}$                                                                                |
| $L_3^3$ | 706.0       | $b_1$ | 16.9            | $7e_{1/2} \rightarrow 99e_{1/2}^{(42)} + 7e_{1/2} \rightarrow 102e_{1/2}^{(15)} + 9e_{1/2} \rightarrow 102e_{1/2}^{(13)}$                                                                                 |
| $L_3^3$ | 706.0       | $a_1$ | 6.7             | $8e_{1/2} \rightarrow 99e_{1/2}^{(42)} + 8e_{1/2} \rightarrow 102e_{1/2}^{(15)} + 10e_{1/2} \rightarrow 102e_{1/2}^{(13)}$                                                                                |
| $L_3^3$ | 706.1       | $a_1$ | 11.4            | $8e_{1/2} \rightarrow 104e_{1/2}^{(20)} + 7e_{1/2} \rightarrow 104e_{1/2}^{(13)} + 8e_{1/2} \rightarrow 99e_{1/2}^{(13)} + 8e_{1/2} \rightarrow 100e_{1/2}^{(12)}$                                        |
| $L_3^3$ | 706.1       | $b_1$ | 9.3             | $7e_{1/2} \rightarrow 104e_{1/2}^{(20)} + 8e_{1/2} \rightarrow 104e_{1/2}^{(13)} + 7e_{1/2} \rightarrow 99e_{1/2}^{(13)} + 7e_{1/2} \rightarrow 100e_{1/2}^{(12)}$                                        |
| $L_3^3$ | 706.2       | $b_1$ | 5.1             | $8e_{1/2} \rightarrow 104e_{1/2}^{(69)} + 7e_{1/2} \rightarrow 104e_{1/2}^{(26)}$                                                                                                                         |
| $L_3^3$ | 706.3       | $a_1$ | 25.9            | $8e_{1/2} \rightarrow 104e_{1/2}^{(48)} + 7e_{1/2} \rightarrow 104e_{1/2}^{(15)} + 8e_{1/2} \rightarrow 99e_{1/2}^{(10)}$                                                                                 |
| $L_3^3$ | 706.3       | $b_1$ | 6.5             | $7e_{1/2} \rightarrow 104e_{1/2}^{(49)} + 8e_{1/2} \rightarrow 104e_{1/2}^{(15)} + 7e_{1/2} \rightarrow 99e_{1/2}^{(10)}$                                                                                 |
| $L_3^3$ | 706.3       | $b_2$ | 63.6            | $7e_{1/2} \rightarrow 102e_{1/2}^{(22)} + 10e_{1/2} \rightarrow 104e_{1/2}^{(21)}$                                                                                                                        |

<sup>a</sup>The Fe  $f(EE)$  distribution displayed in the left panel of Figure 4 has been blue-shifted by 4.66 eV to allow the matching between the most intense theoretical and experimental features. <sup>b</sup>Contributions to  $iso \rightarrow fso$  of less than 10% are not reported; <sup>c</sup>( $f \times 10^3$ ) values of less than 5 are not reported. <sup>d</sup>Fe 2p-based levels are:  $5e_{1/2}/6e_{1/2}$ ,  $7e_{1/2}/8e_{1/2}$  and  $9e_{1/2}/10e_{1/2}$  at 724.27; 711.80, and 711.57 eV, respectively. <sup>e</sup>The parenthesis of the Fe 2p-based levels with SR ZORA Fe 2p-based MOS is:  $5e_{1/2} \rightarrow 3a_1^{(33)} + 4b_1^{(32)} + 1b_2^{(31)}$ ;  $6e_{1/2} \rightarrow 3b_1^{(33)} + 4a_1^{(32)} + 1a_2^{(31)}$ ;  $7e_{1/2} \rightarrow 3a_1^{(56)} + 4b_1^{(33)} + 3b_1^{(5)}$ ;  $8e_{1/2} \rightarrow 3b_1^{(56)} + 4a_1^{(33)} + 3a_1^{(5)}$ ;  $9e_{1/2} \rightarrow 1b_2^{(59)} + 4b_1^{(30)} + 3a_1^{(5)} + 1a_2^{(5)}$ ;  $10e_{1/2} \rightarrow 1a_2^{(59)} + 4a_1^{(30)} + 3b_1^{(5)} + 1b_2^{(5)}$ . <sup>f</sup>The lowest unoccupied spinor is the  $90e_{1/2}$ . <sup>g</sup>The parenthesis of the lowest unoccupied spinor with the SR ZORA LUMOs is  $90e_{1/2} \rightarrow 28b_1^{(100)}$ . <sup>h</sup>The parenthesis of the  $91e_{1/2}$ ,  $92e_{1/2}$ ,  $93e_{1/2}$ ,  $94e_{1/2}$ ,  $95e_{1/2}$ ,  $96e_{1/2}$ ,  $97e_{1/2}$ ,  $98e_{1/2}$ ,  $99e_{1/2}$ ,  $100e_{1/2}$ ,  $102e_{1/2}$ ,  $103e_{1/2}$ ,  $104e_{1/2}$  spinors with SR ZORA VMOs is  $91e_{1/2} \rightarrow 33a_1^{(98)}$ ;  $92e_{1/2} \rightarrow 18b_2^{(98)}$ ;  $93e_{1/2} \rightarrow 34a_1^{(99)}$ ;  $94e_{1/2} \rightarrow 14a_2^{(99)}$ ;  $95e_{1/2} \rightarrow 19b_2^{(100)}$ ;  $96e_{1/2} \rightarrow 29b_1^{(96)} + 35a_1^{(3)}$ ;  $97e_{1/2} \rightarrow 35a_1^{(97)} + 29b_1^{(3)}$ ;  $98e_{1/2} \rightarrow 20b_2^{(100)}$ ;  $99e_{1/2} \rightarrow 30b_1^{(100)}$ ;  $100e_{1/2} \rightarrow 36a_1^{(87)} + 21b_2^{(10)} + 15a_2^{(3)}$ ;  $102e_{1/2} \rightarrow 15a_2^{(97)} + 36a_1^{(3)}$ ;  $103e_{1/2} \rightarrow 16a_2^{(100)}$ ;  $104e_{1/2} \rightarrow 31b_1^{(100)}$ .

**Table S5.** Energy order of C and O 1s-based SALCs ( $\sigma$ SALCs) of *cis*-I

|                                              | a <sub>1</sub> | a <sub>2</sub> | b <sub>1</sub> | b <sub>2</sub> |
|----------------------------------------------|----------------|----------------|----------------|----------------|
| O( $\eta^1$ -CO)                             | 5              |                | 5              |                |
| O( $\mu$ -CO)                                | 6              |                |                | 2              |
| C( $\eta^1$ -CO)                             | 7              |                | 6              |                |
| C( $\mu$ -CO)                                | 8              |                |                | 3              |
| C( $\eta^5$ -C <sub>5</sub> H <sub>5</sub> ) | 9+10+11        | 2+3            | 7+8+9          | 4+5            |

**Table S6.** SR ZORA RTD-DFT compositions (in parentheses),  $f \times 10^2$  and  $EE$  values (eV) of transitions of symmetry  $a_1$ ,  $b_1$  and  $b_2$ , associated to states generating the C K-edge in *cis-I* ( $C_{2v}$ ).<sup>a,b,c,d,e</sup>

| Peak | $EE$ (eV) | Sym.  | $f \times 10^2$ | Transitions                                                                                                                                                                                                                        |
|------|-----------|-------|-----------------|------------------------------------------------------------------------------------------------------------------------------------------------------------------------------------------------------------------------------------|
| A    | 276.3     | $b_1$ | 1.6             | $11a_1 \rightarrow 28b_1^{(75)} + 9b_1 \rightarrow 33a_1^{(15)}$                                                                                                                                                                   |
| A    | 276.3     | $a_1$ | 2.0             | $9b_1 \rightarrow 28b_1^{(75)} + 11a_1 \rightarrow 33a_1^{(15)}$                                                                                                                                                                   |
| B    | 276.9     | $b_1$ | 4.5             | $3a_2 \rightarrow 18b_2^{(73)} + 5b_2 \rightarrow 14a_2^{(13)}$                                                                                                                                                                    |
| B    | 276.9     | $a_1$ | 4.0             | $5b_2 \rightarrow 18b_2^{(74)} + 3a_2 \rightarrow 14a_2^{(13)}$                                                                                                                                                                    |
| C    | 277.6     | $b_1$ | 12.1            | $6b_1 \rightarrow 34a_1^{(49)} + 7a_1 \rightarrow 29b_1^{(27)}$                                                                                                                                                                    |
| C    | 277.7     | $a_1$ | 3.7             | $9b_1 \rightarrow 32b_1^{(16)} + 11a_1 \rightarrow 36a_1^{(12)} + 11a_1 \rightarrow 33a_1^{(12)} + 5b_2 \rightarrow 18b_2^{(11)} + 11a_1 \rightarrow 37a_1^{(11)} + 11a_1 \rightarrow 38a_1^{(10)}$                                |
| C    | 277.7     | $b_1$ | 5.7             | $11a_1 \rightarrow 32b_1^{(15)} + 9b_1 \rightarrow 36a_1^{(12)} + 9b_1 \rightarrow 33a_1^{(12)} + 9b_1 \rightarrow 37a_1^{(11)} + 3a_2 \rightarrow 18b_2^{(11)} + 9b_1 \rightarrow 34a_1^{(10)} + 9b_1 \rightarrow 38a_1^{(10)}$   |
| C    | 277.9     | $b_2$ | 10.9            | $6b_1 \rightarrow 14a_2^{(36)} + 7a_1 \rightarrow 19b_2^{(18)} + 7a_1 \rightarrow 20b_2^{(15)} + 7a_1 \rightarrow 18b_2^{(14)}$                                                                                                    |
| C    | 278.4     | $b_1$ | 1.8             | $5b_2 \rightarrow 15a_2^{(30)} + 3a_2 \rightarrow 21b_2^{(17)} + 3a_2 \rightarrow 22b_2^{(16)} + 5b_2 \rightarrow 14a_2^{(11)}$<br>$3a_2 \rightarrow 18b_2^{(10)} + 9b_1 \rightarrow 34a_1^{(10)} + 9b_1 \rightarrow 38a_1^{(10)}$ |
| C    | 278.7     | $a_1$ | 5.3             | $3b_2 \rightarrow 19b_2^{(73)} + 3b_2 \rightarrow 20b_2^{(23)}$                                                                                                                                                                    |

<sup>a</sup> $EE$ s herein reported have been evaluated by adopting the PBE0 XC functional. <sup>b</sup>The  $C f(EE)$  distribution displayed in the left, upper panel of Figure 6 has been blue-shifted by 9.80 eV to allow the matching between the most intense theoretical and experimental features. <sup>c</sup>Contributions to  $iso \rightarrow fso$  of less than 10% are not included; <sup>d</sup>( $f \times 10^2$ ) values of less than 1.5 are not included. <sup>e</sup>The C 1s-based SALCs lie at: -281.55 eV ( $7a_1 + 6b_1$ ;  $\eta^1-CO$ ); -281.13 eV ( $8a_1 + 3b_2$ ;  $\mu-CO$ ); -279.54 eV ( $9a_1 + 7b_1$ ;  $\eta^5-C_5H_5$ ); -279.52 eV ( $2a_2 + 4b_2$ ;  $\eta^5-C_5H_5$ ); -279.50 eV ( $8b_1 + 10a_1$ ;  $\eta^5-C_5H_5$ ); -279.49 eV ( $3a_2 + 5b_2$ ;  $\eta^5-C_5H_5$ ); -279.48 eV ( $9b_1 + 11a_1$ ;  $\eta^5-C_5H_5$ ).

**Table S7.** SR ZORA TD-DFT % compositions (in parentheses),  $f \times 10^3$  and  $EE$  values (eV) of transitions of symmetry  $a_1$ ,  $b_1$  and  $b_2$  associated to states generating the O K-edge of *cis*-**1** ( $C_{2v}$ ).<sup>a,b,c,d,e</sup>

| Peak | $EE$ (eV) | Sym.  | $f \times 10^3$ | Transitions                                                                                    |
|------|-----------|-------|-----------------|------------------------------------------------------------------------------------------------|
| S    | 529.2     | $a_1$ | 7.2             | $2b_2 \rightarrow 19b_2^{(84)} + 6a_1 \rightarrow 35a_1^{(14)}$                                |
| S'   | 529.5     | $a_1$ | 11.8            | $6a_1 \rightarrow 35a_1^{(56)} + 2b_2 \rightarrow 20b_2^{(38)} + 2b_2 \rightarrow 19b_2^{(5)}$ |
| S'   | 529.7     | $a_1$ | 28.6            | $2b_2 \rightarrow 20b_2^{(61)} + 6a_1 \rightarrow 35a_1^{(30)} + 2b_2 \rightarrow 19b_2^{(8)}$ |
| S'   | 529.9     | $b_1$ | 9.2             | $5b_1 \rightarrow 34a_1^{(93)}$                                                                |
| S'   | 530.0     | $b_2$ | 9.3             | $5b_1 \rightarrow 14a_2^{(76)} + 5a_1 \rightarrow 19b_2^{(19)}$                                |
| A    | 530.5     | $b_1$ | 22.7            | $2b_2 \rightarrow 15a_2^{(78)} + 6a_1 \rightarrow 30b_1^{(20)}$                                |
| A    | 530.6     | $b_1$ | 31.7            | $5a_1 \rightarrow 29b_1^{(87)}$                                                                |
| A    | 530.6     | $b_2$ | 21.7            | $5a_1 \rightarrow 20b_2^{(92)}$                                                                |
| B    | 531.1     | $b_1$ | 6.3             | $2b_2 \rightarrow 16a_2^{(98)}$                                                                |
| B    | 531.3     | $b_2$ | 16.6            | $5b_1 \rightarrow 15a_2^{(95)}$                                                                |

<sup>a</sup> $EE$ s herein reported have been evaluated by adopting the LB94 XC functional. <sup>d</sup>The  $O f(EE)$  distribution displayed in the right, upper panel of Figures 6 has been blue-shifted by 3.57 eV to allow the matching between the most intense theoretical and experimental features. <sup>b</sup>Contributions to  $iso \rightarrow fso$  of less than 10% are not included; <sup>c</sup>( $f \times 10^3$ ) values of less than 5 are not included. <sup>e</sup>The O 1s-based SALCs lie at: -538.08 eV ( $5b_1 + 5a_1$ ;  $\eta^1$ -CO); -537.23 eV ( $6a_1 + 2b_2$ ;  $\mu$ -CO).
